# Supplementary material for: Conformational flexibility determines the Nf2/merlin tumor suppressor functions
Source: PubMed Central journal article supplement — Matrix Biol Plus. 2021 Jul 1;12:100074. doi: 10.1016/j.mbplus.2021.100074 (PMC8318988; doi:10.1016/j.mbplus.2021.100074), 2021-07-01

**Supplementary Table S1. Nf2/merlin head-tail interactions for comparison with Nf2/merlin binding to LATS1 using the PDBePISA server ([https://www.ebi.ac.uk/msd-srv/prot\\_int/pistart.html](https://www.ebi.ac.uk/msd-srv/prot_int/pistart.html)).**

Residues contributing to the Nf2/merlin head domain interface with Nf2/merlin mutant A585W tail domain. Black font is used for interactions with the F1 FERM Nf2/merlin subdomain and blue font for the F2 FERM Nf2/merlin subdomain.

**A. Hydrogen bonds**

| <b>Nf2/merlin</b> | <b>[Å]</b> | <b>Nf2/merlin</b> |
|-------------------|------------|-------------------|
| TYR 132 [OH]      | 2.70       | ASP 559 [OD1]     |
| ASN 175 [O]       | 2.94       | ARG 554 [NH1]     |
| GLN 178 [N]       | 2.79       | LEU 549 [O]       |
| LEU 176 [O]       | 2.67       | LEU 551 [N]       |
| ARG 187 [NH1]     | 2.83       | GLU 545 [OE1]     |
| TRP 191 [NE1]     | 3.19       | GLN 538 [OE1]     |
| GLU 194 [OE2]     | 3.64       | HIS 534 [NE2]     |
| GLU 194 [OE1]     | 2.96       | GLN 538 [NE2]     |
| GLU 194 [OE2]     | 2.80       | GLN 538 [NE2]     |
| LEU 214 [O]       | 2.93       | LYS 573 [NZ]      |
| GLU 215 [O]       | 3.73       | LYS 573 [NZ]      |
| TYR 217 [O]       | 3.03       | LYS 573 [NZ]      |
| ASN 226 [ND2]     | 3.13       | LEU 595 [O]       |
| ASN 226 [ND2]     | 2.94       | PHE 592 [O]       |
| ASN 226 [ND2]     | 3.70       | GLU 593 [O]       |
| LYS 227 [N]       | 2.98       | GLU 593 [OE1]     |
| LYS 228 [NZ]      | 3.27       | GLU 594 [O]       |
| GLU 260 [OE1]     | 2.10       | ARG 588 [NH1]     |
| GLU 260 [OE2]     | 2.75       | ARG 588 [NH2]     |
| ASP 281 [O]       | 2.80       | TRP 585 [NE1]     |

**B. electrostatic interactions**

| <b>Nf2/merlin</b> | <b>[Å]</b> | <b>Nf2/merlin</b> |
|-------------------|------------|-------------------|
| ARG 187 [NH1]     | 2.83       | GLU 545 [OE1]     |
| GLU 194 [OE2]     | 3.64       | HIS 534 [NE2]     |
| GLU 260 [OE1]     | 2.10       | ARG 588 [NH1]     |
| GLU 260 [OE2]     | 3.01       | ARG 588 [NH1]     |
| GLU 260 [OE1]     | 3.52       | ARG 588 [NH2]     |
| GLU 260 [OE2]     | 2.75       | ARG 588 [NH2]     |

**Supplementary Figure S1. Comparison of the LATS1-bound Nf2/merlin structure with the unbound apo Nf2/merlin structure**

Surface representation of Nf2/merlin (red, oxygen; blue, nitrogen; white, carbon; yellow, sulfur) with LATS1 shown in stick representation.

**A.** Upon binding to LATS1, rearrangement occurs and LATS1 fits well in the groove. N- (K70) and C-terminal residues (E91) are indicated.

**B.** In the apo form, the LATS1 binding groove is not well-formed and blocked by Glu-136 (not shown).

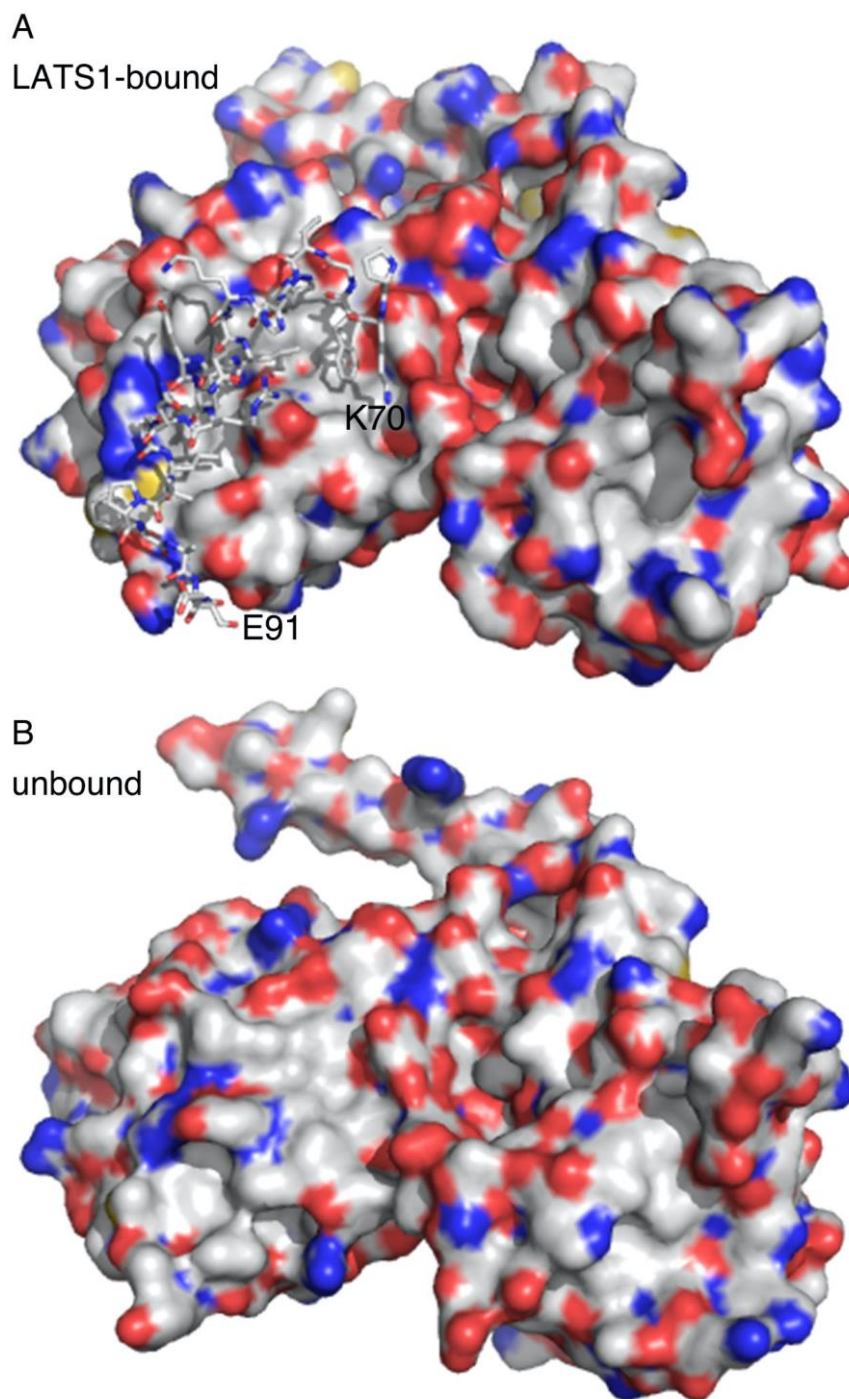

**Supplementary Figure S2. The extended Nf2/merlin C-terminal  $\alpha$ -helix is necessary to understand the allosteric binding mechanism**

Superposition of our 1.6 Å structure (residues 21-338; F1, orange; F2, yellow; F3, green) onto the truncated 2.3 Å or 2.7 Å Nf2/merlin structures (residues 21-311, gray) bound to LATS1 (cyan; PDB entry 4zrk) (40) or LATS2 (gray; PDB entry 4zri) (40), confirms our observed allosteric mechanism: the F1-F2 subdomains (residues 21-215; F1, orange; F2, yellow) superimpose with root means squares deviations of 0.668 Å for LATS1 (or 0.581 Å for LATS2) for 1,363 atoms (or 1,379 atoms for LATS2, cyan) while including F3 (residues 21-311, green) superimposes much poorer with root means squares deviations of 0.996 Å for LATS1 (or 0.806 Å for LATS2) for 2,028 atoms (or 1,913 atoms for LATS2). The movements of over 3 Å for example seen at residue Lys-279 of the Nf2/merlin F3 subdomain upon binding of LATS to the Nf2/merlin F2 sub-domain is indicated by a double arrow. Furthermore, in the 2.3 Å truncated Nf2/merlin structure bound to LATS1, its N-terminus (LATS1 residues 69-73, cyan) points in the opposite direction compared to LATS1 seen in our 1.6 Å Nf2/merlin (residues 21-338) and LATS2 in the LATS2-bound structure (PDB entry 4zri) (40).

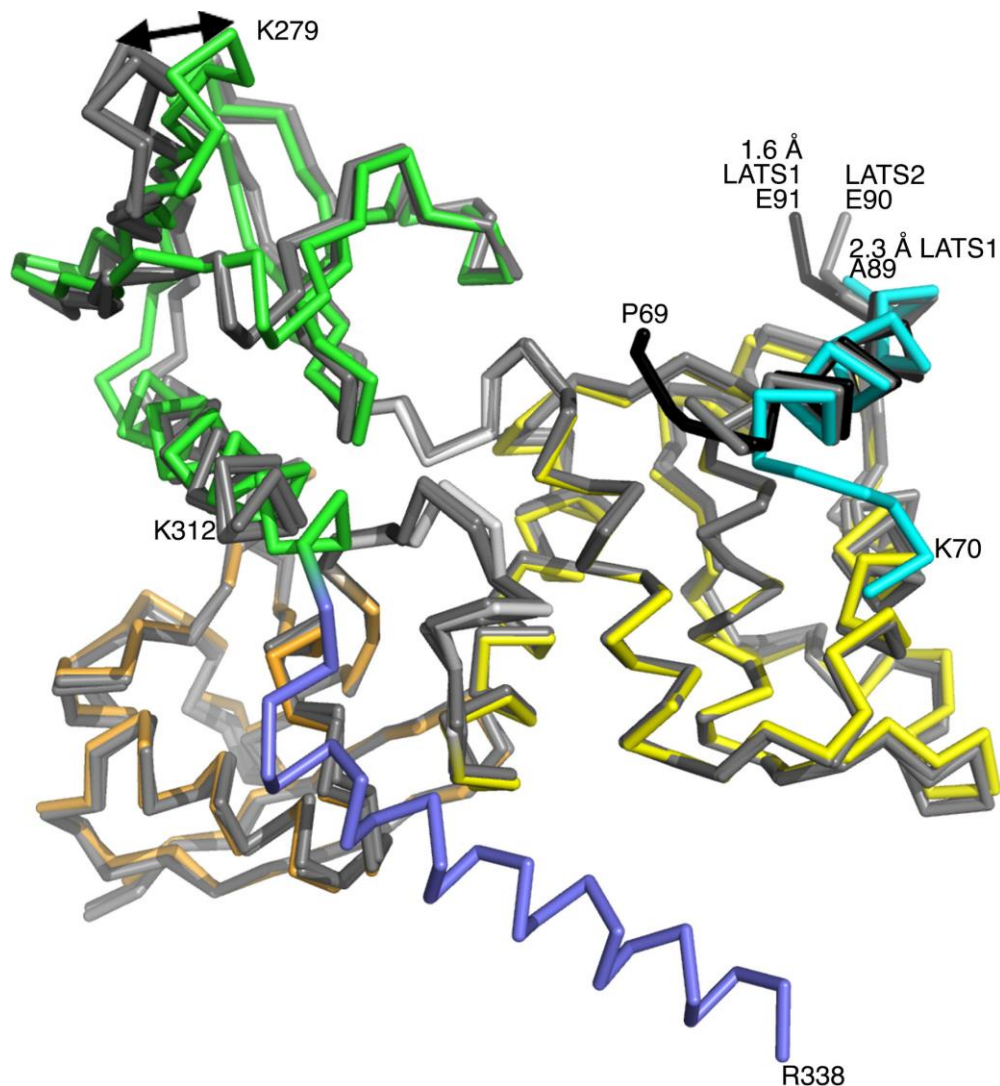

Supplement: mmc1.pdf [file mmc1.pdf]
